# Supplementary material for: Homogeneous Inflammatory Gene Profiles Induced in Human Dermal Fibroblasts in Response to the Three Main Species of Borrelia burgdorferi sensu lato
Source: PubMed Central journal article supplement (PMC5051687; doi:10.1371/journal.pone.0164117), 2016-10-05

A. Analysis of pathways regulated in fibroblasts by *B. burgdorferi* sensu stricto strain IBS19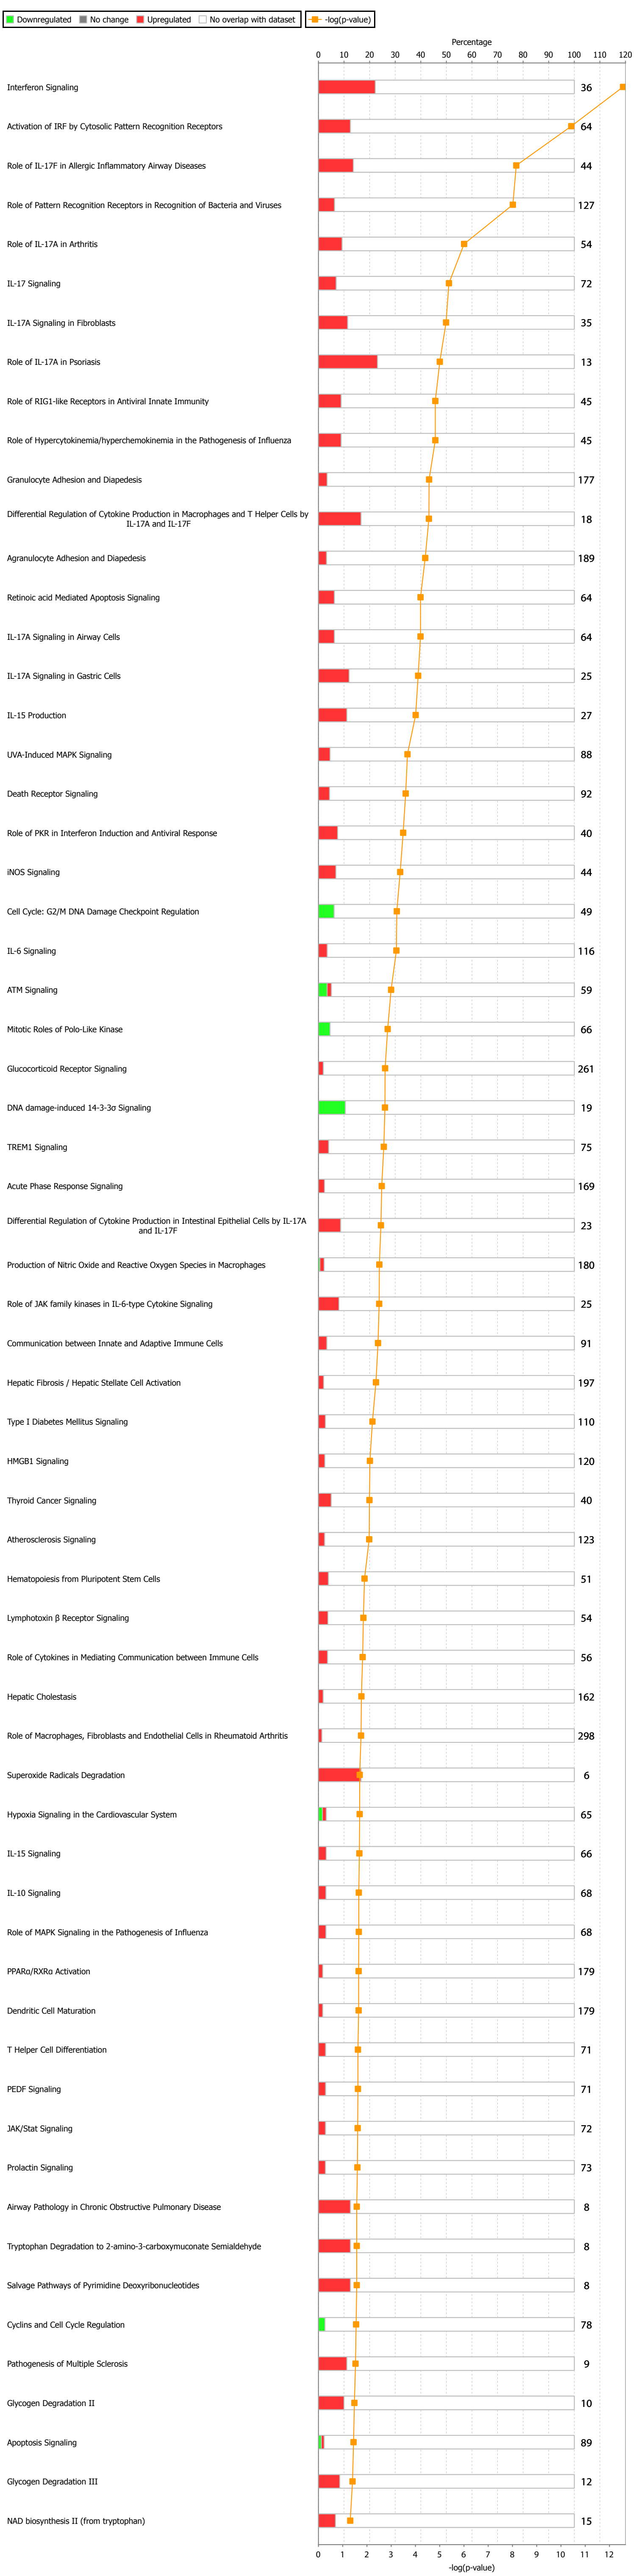B. Analysis of pathways regulated in fibroblasts by *B. garinii* strain IBS6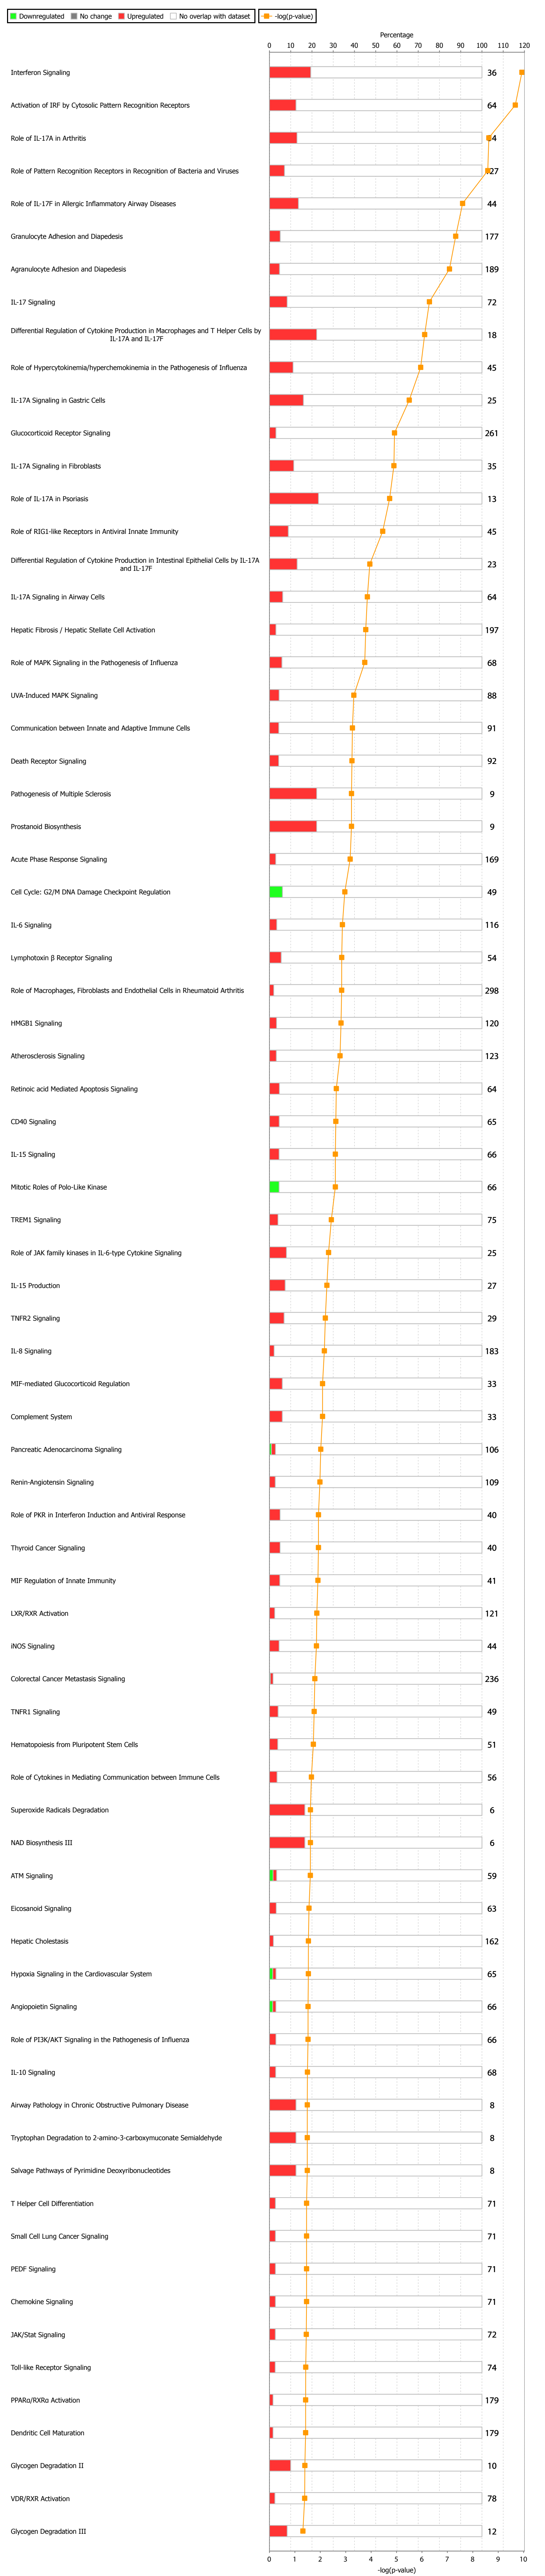C. Analysis of pathways regulated in fibroblasts by *B. afzelii* strain IBS17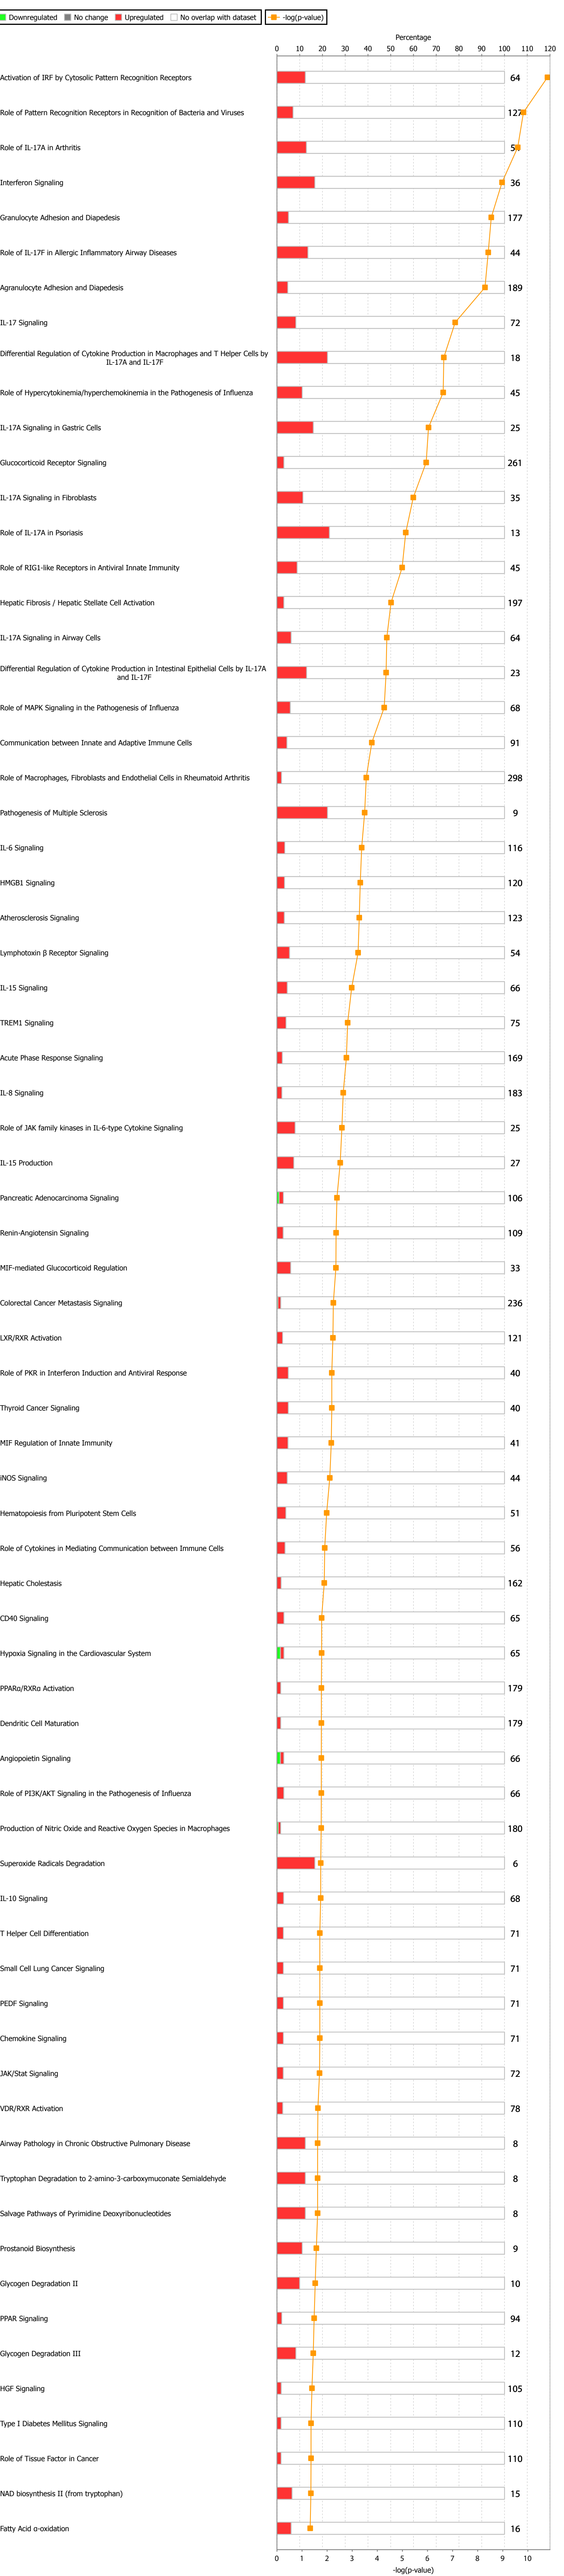

Supplement: pone.0164117.s003.pdf [file pone.0164117.s003.pdf]
